# Supplementary material
Source: publisher site journal article supplement (https://www.dovepress.com/article/433524)

**Supplementary Figure 1** Methodology flow chart of study experimental procedures.


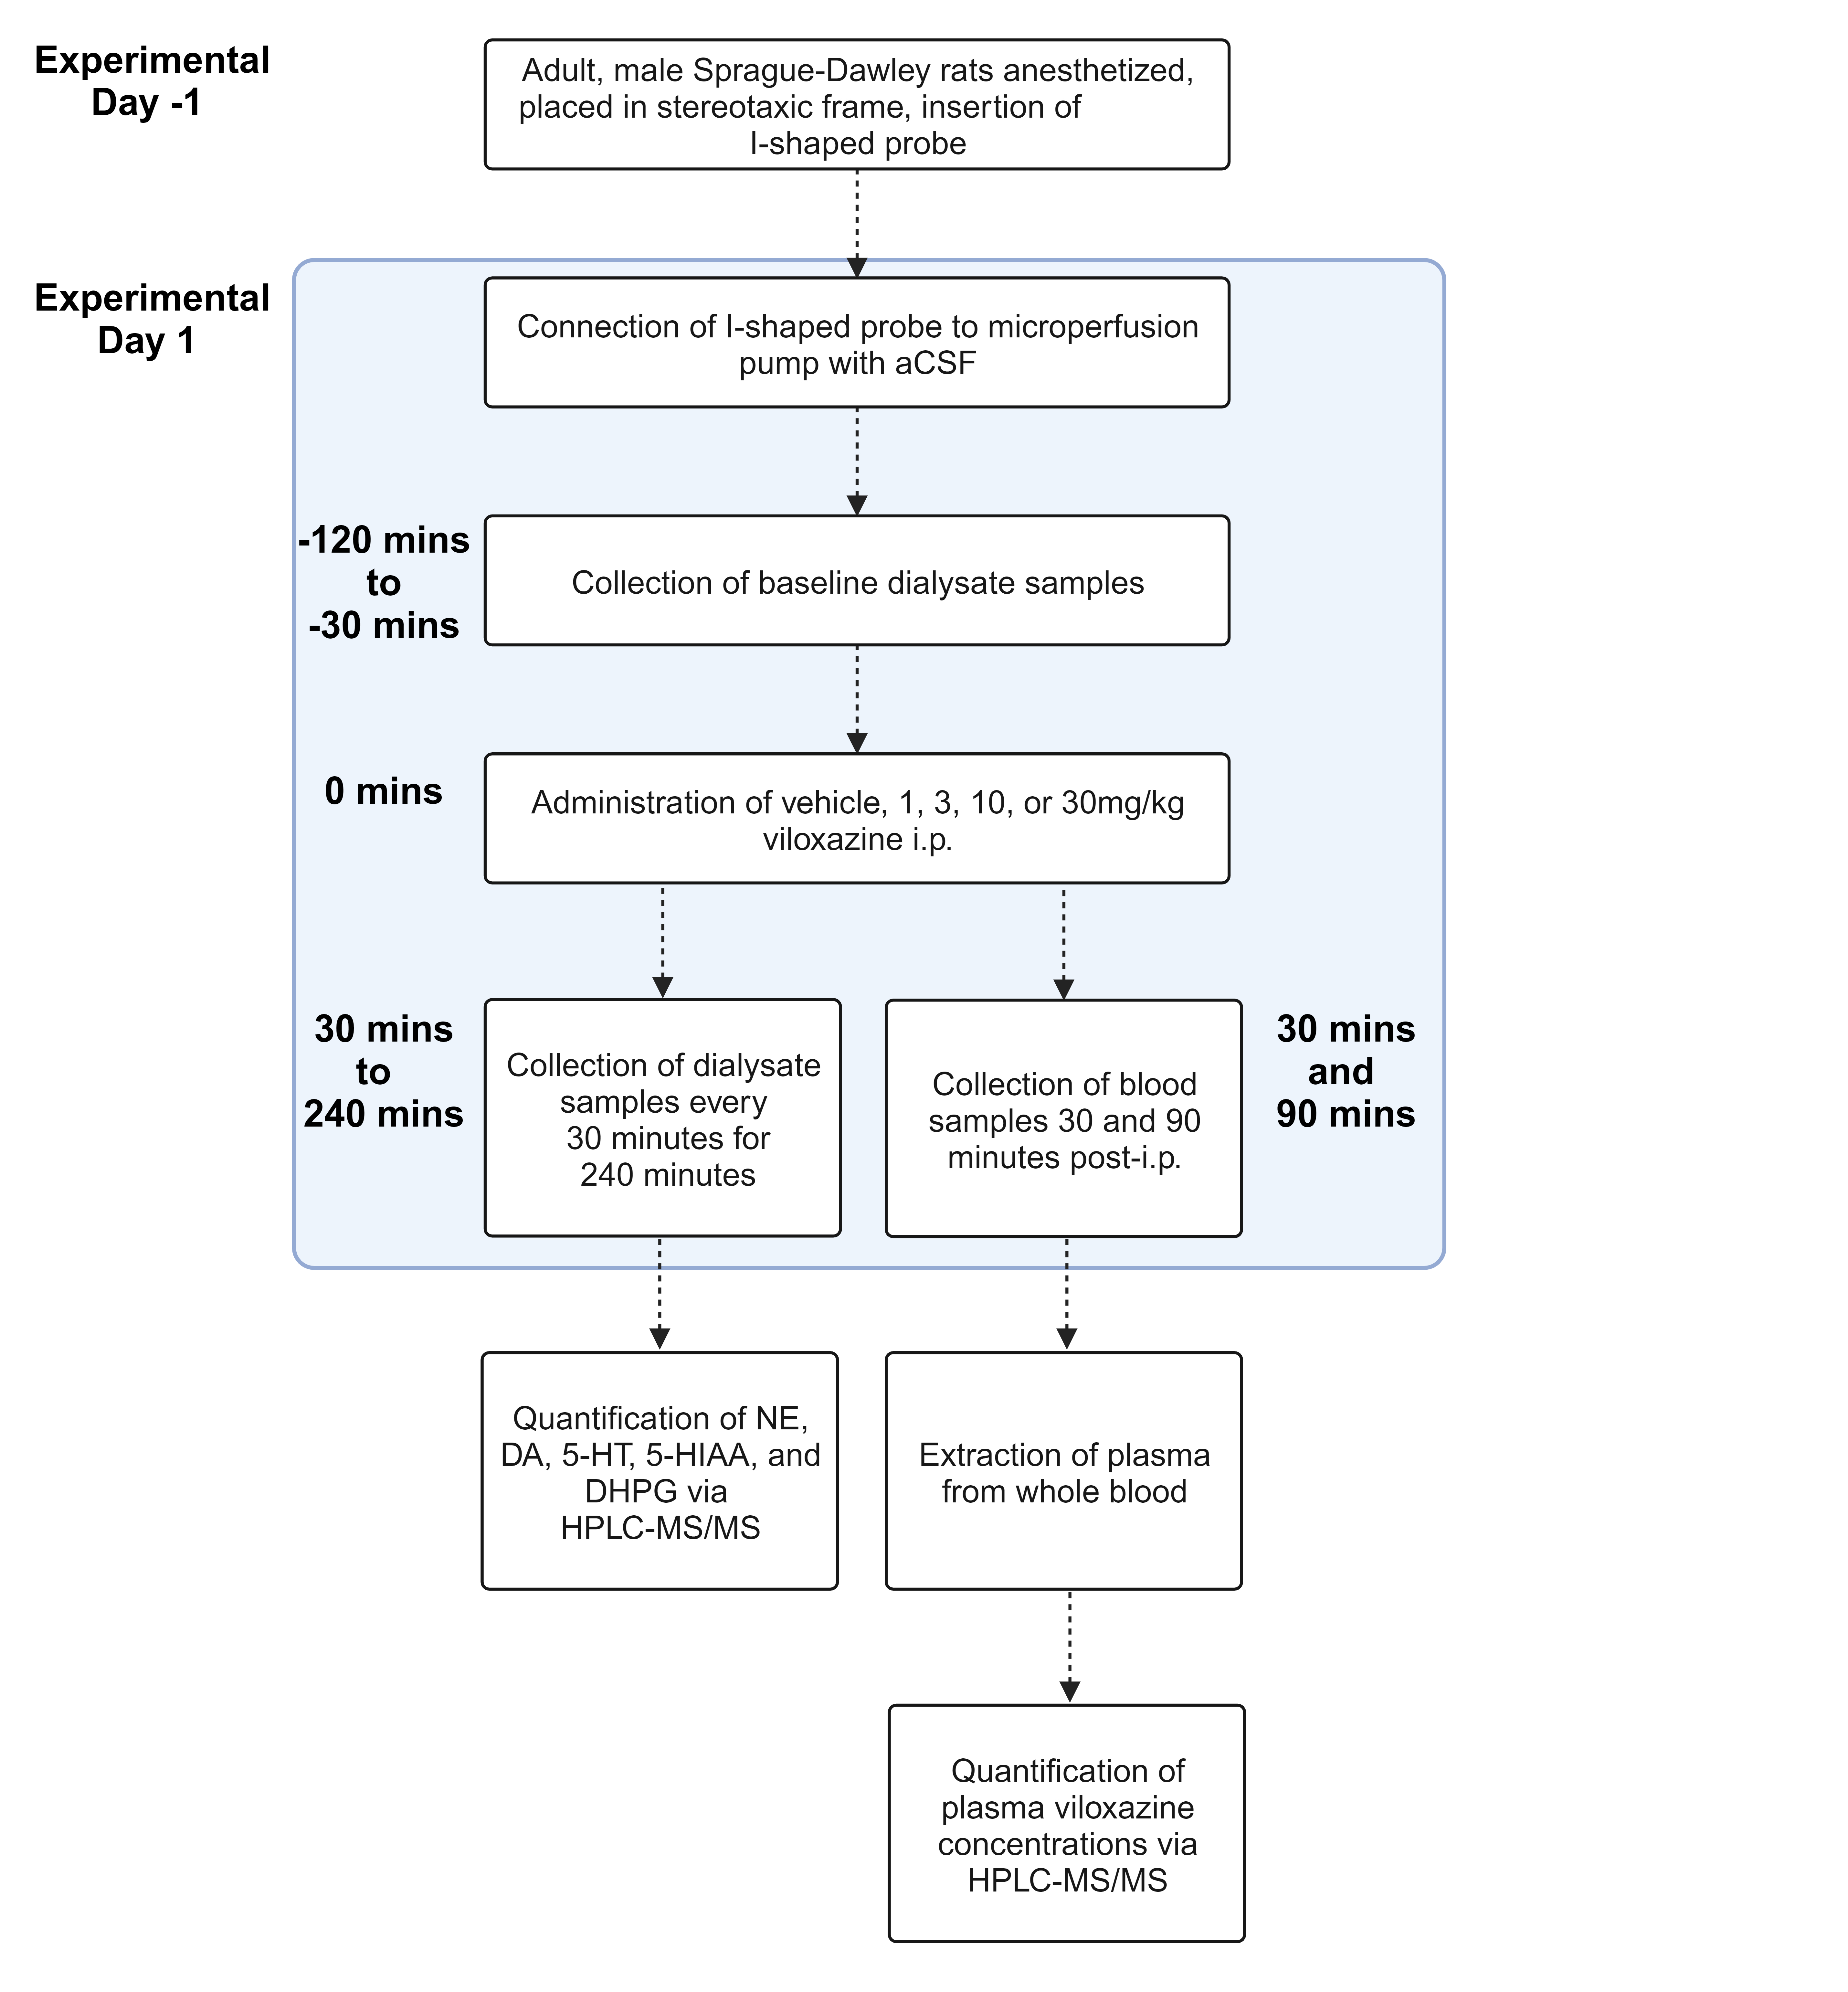


**Supplementary Figure 2** Extracellular viloxazine levels in the PFC up to four hours after intraperitoneal administration. Dialysate samples (ISF) were collected at 30-minute intervals for the determination of viloxazine levels following IP administration of viloxazine 1 mg/kg (n=5), 3 mg/kg (n=5), 10 mg/kg (n=4), and 30 mg/kg (n=5). All data represent mean ± SEM.


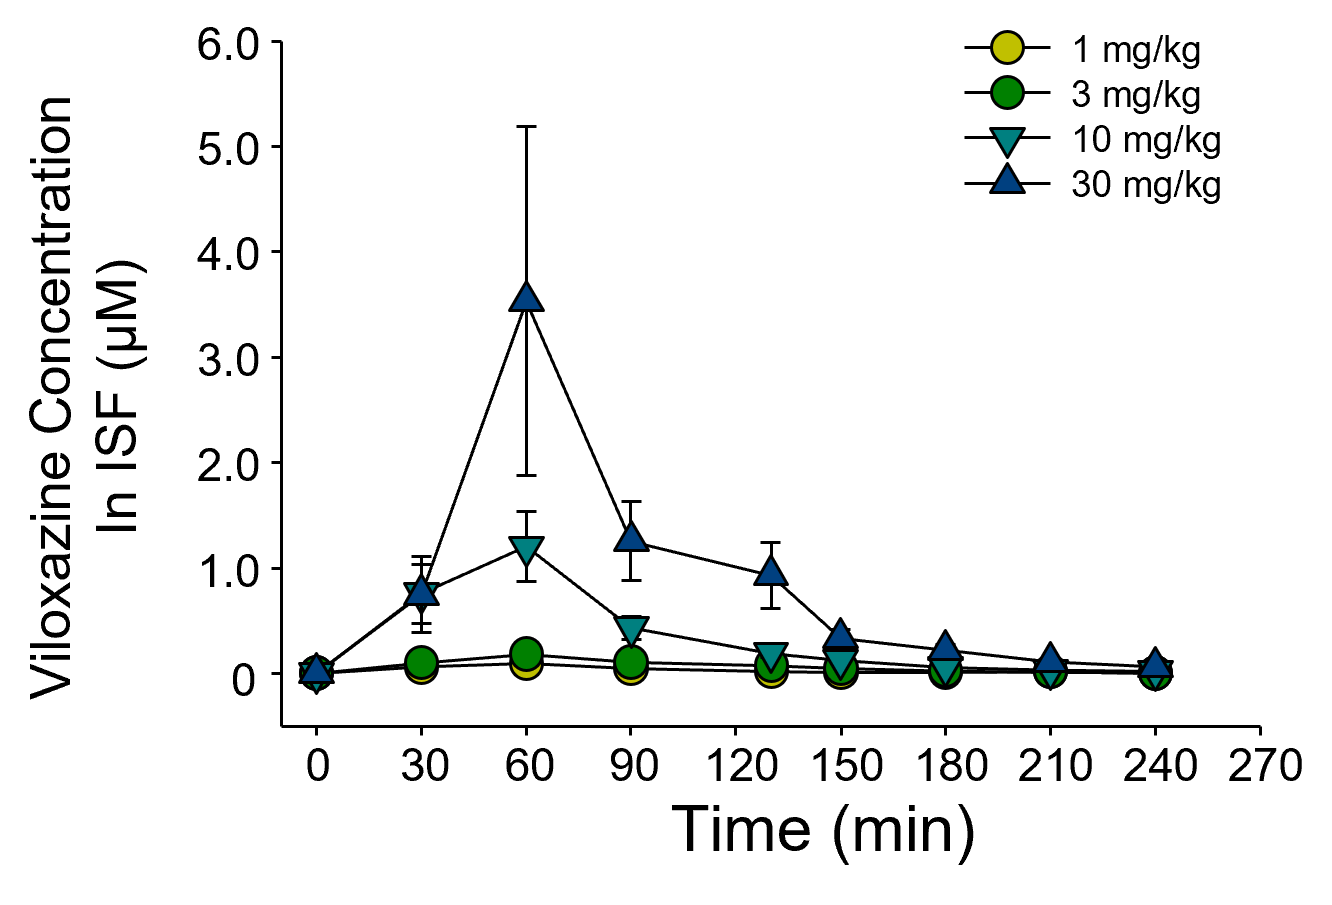

Supplement: Supplementary file 1 [file get_supplementary_file.php]
